# Supplementary material for: Comparing Treatment Outcomes of Ampicillin-Sulbactam, Other β-Lactams, and Vancomycin in Blood Culture-Negative Infective Endocarditis
Source: MDPI journal article supplement (doi:10.3390/antibiotics10121476), 2021-12-01
Supplement: s1 [file s1]

**Table S1. Comparison of treatment outcomes between ampicillin-sulbactam and Other  $\beta$ -lactams group**

|                                                          | Ampicillin-sulbactam<br>(n=20) | Other $\beta$ -lactams<br>(n=36) | <i>p</i><br>value  |
|----------------------------------------------------------|--------------------------------|----------------------------------|--------------------|
| Duration of antibiotics treatment, days,<br>median (IQR) | 31 (20.75-42)                  | 30.5 (24.75-50)                  | 0.51 <sup>1</sup>  |
| Surgery performed (%)                                    | 15 (75.0)                      | 28 (77.8)                        | 1                  |
| Clinical outcomes (%)                                    |                                |                                  |                    |
| New-onset heart failure                                  | 3 (15.0)                       | 3 (8.3)                          | 0.655 <sup>2</sup> |
| New conduction abnormality                               | 4 (20.0)                       | 2 (5.6)                          | 0.172 <sup>2</sup> |
| Paravalvular complication                                | 1 (5.0)                        | 2 (5.6)                          | 1.000 <sup>2</sup> |
| Renal failure                                            | 3 (15.0)                       | 2 (5.6)                          | 0.336 <sup>2</sup> |
| CNS involvement                                          | 6 (30.0)                       | 10 (27.8)                        | 1.000              |
| Systemic embolism                                        | 2 (10.0)                       | 2 (5.6)                          | 0.611 <sup>2</sup> |
| Mortality (%)                                            |                                |                                  |                    |
| 1-year mortality                                         | 5 (25.0)                       | 6 (16.7)                         | 0.497 <sup>2</sup> |
| In-hospital mortality                                    | 1 (5.0)                        | 4 (11.1)                         | 0.645 <sup>2</sup> |
| 28-days mortality                                        | 0                              | 3 (8.3)                          | 0.546 <sup>2</sup> |
| Overall mortality                                        | 6 (30.0)                       | 7 (19.4)                         | 0.514 <sup>2</sup> |

IQR, interquartile range, CNS Central nervous system

<sup>1</sup> *p* value was calculated using Mann Whitney U test<sup>2</sup> *p* values were calculated using fisher test**Table S2. Comparison of treatment outcomes between ampicillin-sulbactam and vancomycin group**

|                                                          | Ampicillin-sulbactam<br>(n=20) | Vancomycin<br>(n=18) | <i>p</i><br>value  |
|----------------------------------------------------------|--------------------------------|----------------------|--------------------|
| Duration of antibiotics treatment, days,<br>median (IQR) | 31 (20.75-42)                  | 28 (23.25-41.5)      | 1 <sup>1</sup>     |
| Surgery performed (%)                                    | 15 (75.0)                      | 13 (72.2)            | 1                  |
| Clinical outcomes (%)                                    |                                |                      |                    |
| New-onset heart failure                                  | 3 (15.0)                       | 2 (11.1)             | 1 <sup>2</sup>     |
| New conduction abnormality                               | 4 (20.0)                       | 2 (11.1)             | 0.663 <sup>2</sup> |
| Paravalvular complication                                | 1 (5.0)                        | 2 (11.1)             | 0.595 <sup>2</sup> |
| Renal failure                                            | 3 (15.0)                       | 2 (11.1)             | 1 <sup>2</sup>     |
| CNS involvement                                          | 6 (30.0)                       | 3 (16.7)             | 0.454 <sup>2</sup> |
| Systemic embolism                                        | 2 (10.0)                       | 2 (11.1)             | 1 <sup>2</sup>     |
| Mortality (%)                                            |                                |                      |                    |
| 1-year mortality                                         | 5 (25.0)                       | 2 (11.1)             | 0.41 <sup>2</sup>  |
| In-hospital mortality                                    | 1 (5.0)                        | 2 (11.1)             | 0.595 <sup>2</sup> |
| 28-days mortality                                        | 0 (0.0)                        | 1 (5.6)              | 0.474 <sup>2</sup> |
| Overall mortality                                        | 6 (30.0)                       | 2 (11.1)             | 0.238 <sup>2</sup> |

IQR, interquartile range, CNS Central nervous system

<sup>1</sup> *p* value was calculated using Mann Whitney U test<sup>2</sup> *p* values were calculated using fisher test

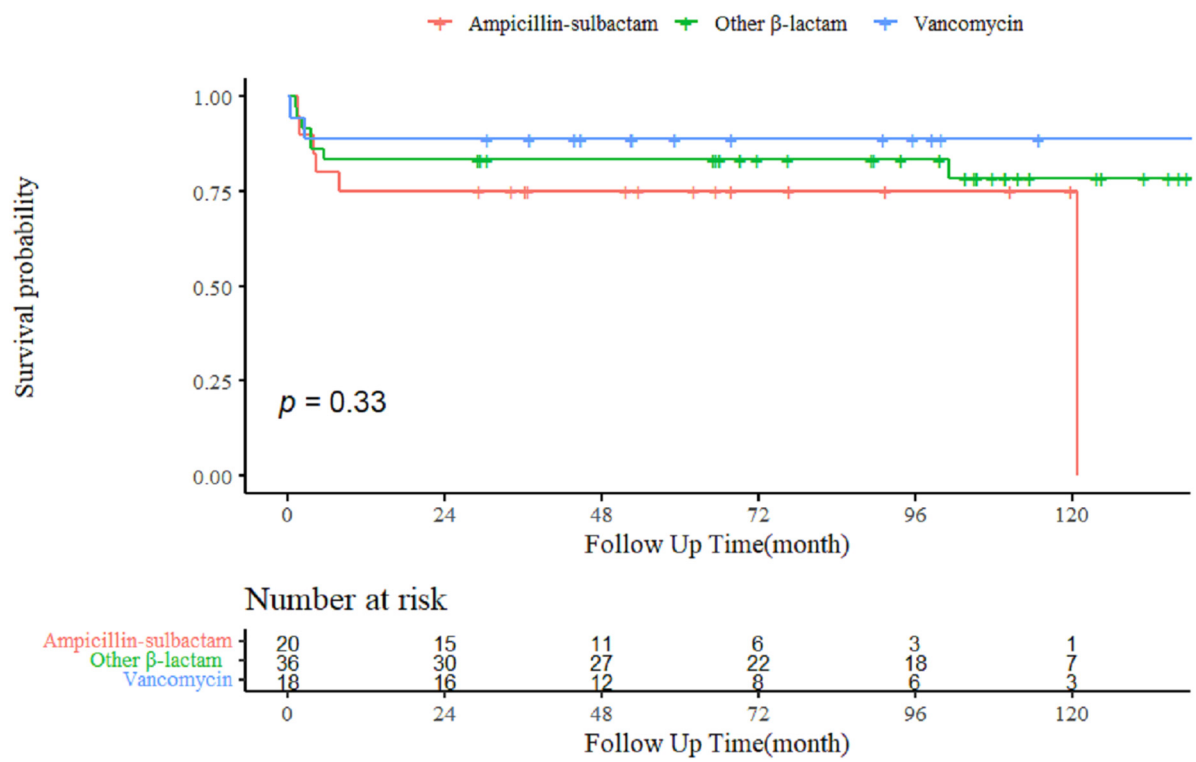

**Figure S1. Kaplan-Meier curves for overall mortality rates of patients with BCNIE.**  
 BCNIE blood culture-negative infective endocarditis
